# Supplementary material
Source: HighWire-hosted journal article supplement (https://jnm.snmjournals.org/highwire/filestream/94337/field_highwire_adjunct_files/0/108969_Supplemental_Data.pdf)
Supplement: 108969_Supplemental_Data.pdf [file 108969_Supplemental_Data.pdf]

**A**

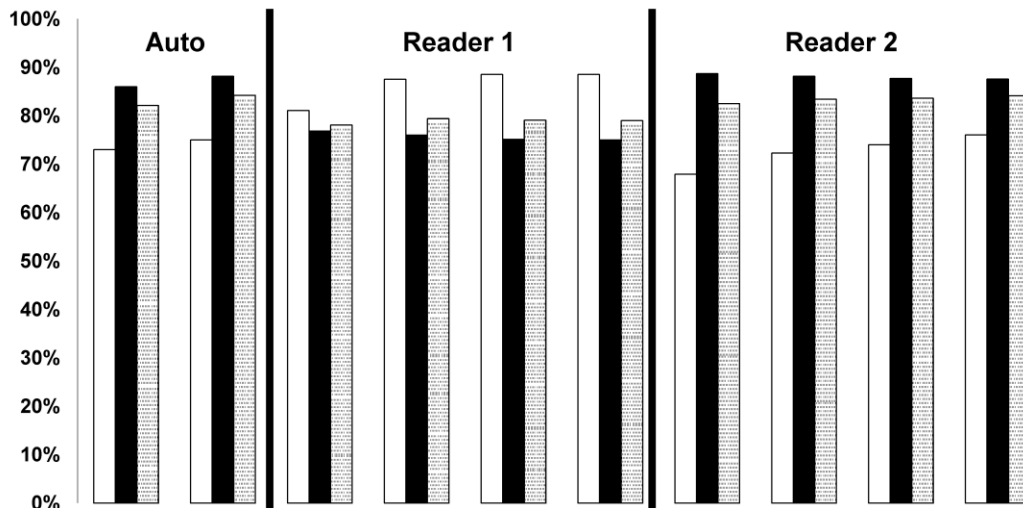

|                                                 | NC  | AC  | V1  | V2  | V3  | V4  | V1  | V2  | V3  | V4  |
|-------------------------------------------------|-----|-----|-----|-----|-----|-----|-----|-----|-----|-----|
| <input type="checkbox"/> Sensitivity            | 73% | 75% | 81% | 88% | 89% | 89% | 68% | 72% | 74% | 76% |
| <input checked="" type="checkbox"/> Specificity | 86% | 88% | 77% | 76% | 75% | 75% | 89% | 88% | 88% | 88% |
| <input checked="" type="checkbox"/> Accuracy    | 82% | 84% | 78% | 79% | 79% | 79% | 83% | 83% | 84% | 84% |

**B**

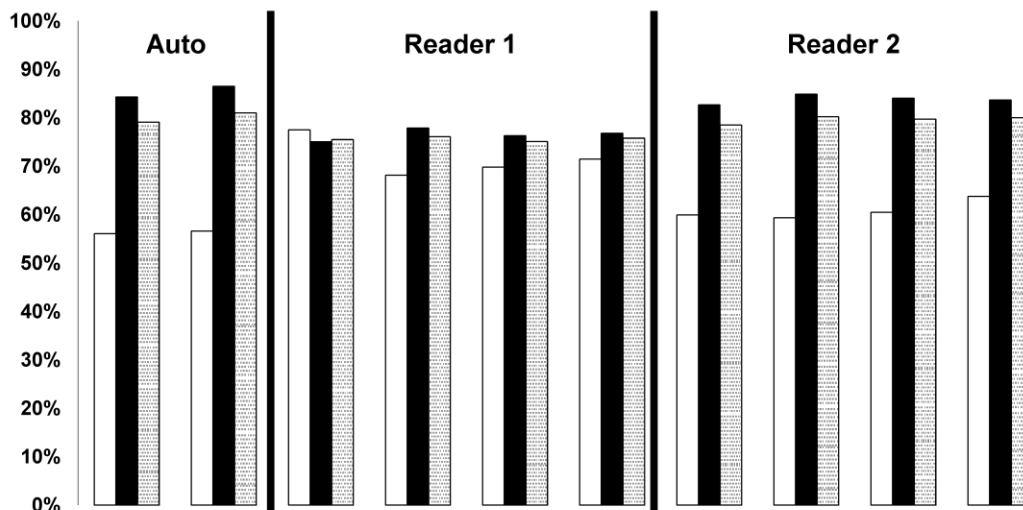

|                                                 | NC  | AC  | V1  | V2  | V3  | V4  | V1  | V2  | V3  | V4  |
|-------------------------------------------------|-----|-----|-----|-----|-----|-----|-----|-----|-----|-----|
| <input type="checkbox"/> Sensitivity            | 56% | 57% | 77% | 68% | 70% | 71% | 60% | 59% | 60% | 64% |
| <input checked="" type="checkbox"/> Specificity | 84% | 86% | 75% | 78% | 76% | 77% | 83% | 85% | 84% | 84% |
| <input checked="" type="checkbox"/> Accuracy    | 79% | 81% | 75% | 76% | 75% | 76% | 78% | 80% | 80% | 80% |

C

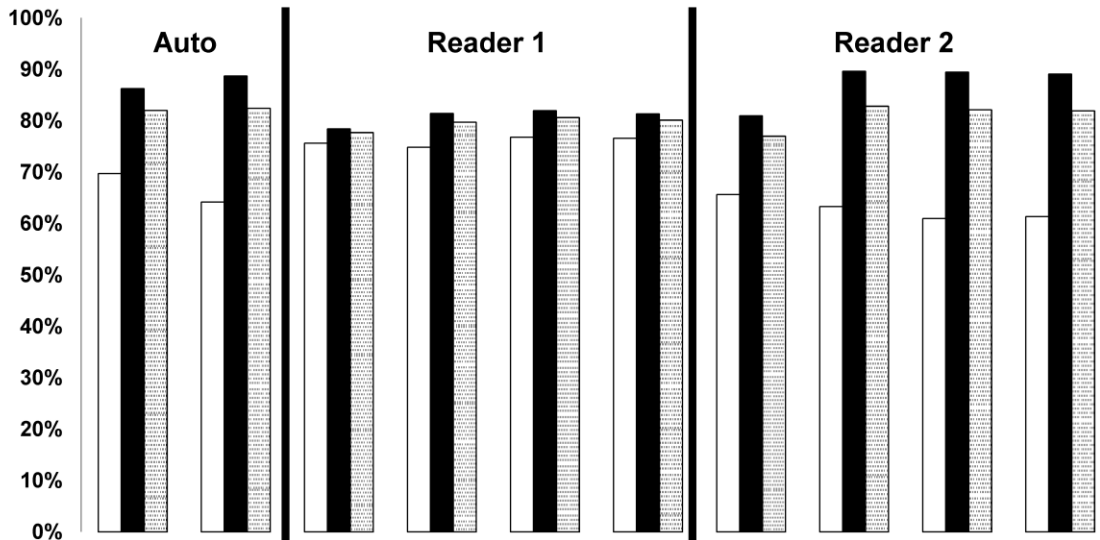

|                                                 | NC  | AC  | V1  | V2  | V3  | V4  | V1  | V2   | V3  | V4  |
|-------------------------------------------------|-----|-----|-----|-----|-----|-----|-----|------|-----|-----|
| <input type="checkbox"/> Sensitivity            | 70% | 64% | 76% | 75% | 77% | 77% | 66% | 63%  | 61% | 61% |
| <input checked="" type="checkbox"/> Specificity | 86% | 89% | 78% | 81% | 82% | 81% | 81% | 90%* | 89% | 89% |
| <input checked="" type="checkbox"/> Accuracy    | 82% | 82% | 78% | 80% | 81% | 80% | 77% | 83%* | 82% | 82% |

\*Different from prior step  $P < 0.05$

Green = visual better than auto  $P < 0.05$  Red = auto better than visual  $P < 0.05$

V1 = NC only

V2 = NC + AC

V3 = NC + AC + computer

V4 = NC + AC + computer + clinical

**Supplemental Figure 1:** Sensitivity, specificity and accuracy of automatic analysis versus visual analysis for detection of  $\geq 70\%$  coronary artery lesions on per-vessel basis in (A) left anterior descending artery (LAD), (B) left circumflex artery (LCX), (C) right coronary artery (RCA) (Number of patients with  $\geq 70\%$  LAD, LCX and RCA stenotic lesions on cardiac catheterization = 296, 182, and 254, respectively). \* Indicates statistically significant difference compared to a prior step ( $P < 0.05$ ). The automated analysis was also compared to visual (NC vs. V1 and AC vs. V2-V4). Green signifies that visual analysis was better than automated analysis, while red signifies that automated analysis was better than visual analysis ( $P < 0.05$ ).
